# Supplementary material
Source: PubMed Central journal article supplement (PMC8281953)
Supplement: NIHMS1572384-supplement-SF1.pdf [file NIHMS1572384-supplement-SF1.pdf]

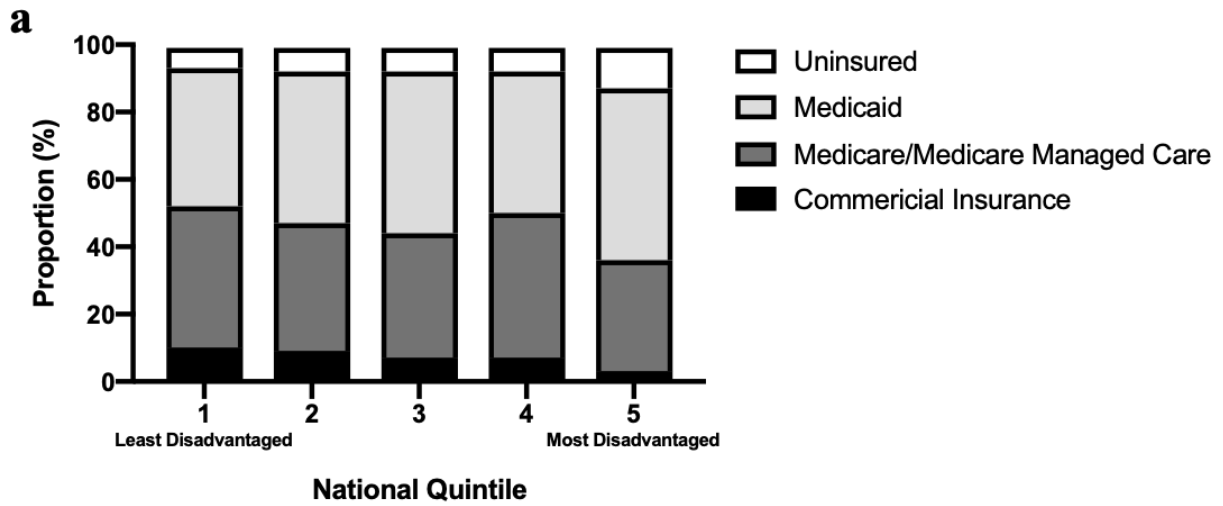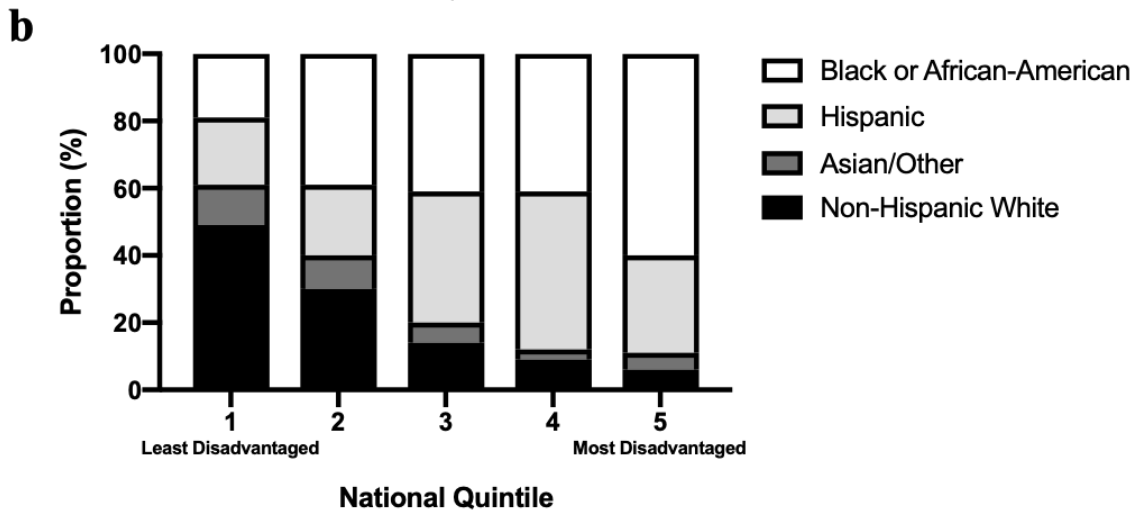

**Figure S1. Primary Insurance (a) and Race (b) Proportions by National ADI quintiles. Higher ADI quintile indicates greater neighborhood deprivation. ADI = Area Deprivation Index**
