# Supplementary material
Source: PubMed Central journal article supplement (PMC8281953)
Supplement: NIHMS1572384-supplement-ST1.pdf [file NIHMS1572384-supplement-ST1.pdf]

**Table S1. Baseline study group characteristics in the total population and by adherence to diabetic retinopathy evaluation**

|                                  | Total Population | Received Examination | Did Not Follow-up |
|----------------------------------|------------------|----------------------|-------------------|
| Parameter                        | <i>N</i>         | <i>n</i>             | <i>n</i>          |
| No. patients                     | 1397             | 727                  | 670               |
| Age, years; mean (SD)            | 54.1 (13.9)      | 55.7 (14.0)          | 52.5 (13.7)       |
| Gender                           |                  |                      |                   |
| Male                             | 600 (42.9%)      | 315 (43.3%)          | 285 (42.5%)       |
| Female                           | 797 (57.1%)      | 412 (56.7%)          | 385 (57.5%)       |
| Race                             |                  |                      |                   |
| Asian or Pacific Islander        | 30 (2.1%)        | 22 (3.0%)            | 8 (1.1%)          |
| Black or African American        | 580 (41.5%)      | 293 (40.3%)          | 287 (42.8%)       |
| Hispanic or Latino               | 488 (34.9%)      | 228 (31.4%)          | 260 (38.8%)       |
| Non-Hispanic White               | 239 (17.1%)      | 153 (21.0%)          | 86 (12.8%)        |
| Other                            | 60 (4.3%)        | 31 (4.3%)            | 29 (4.3%)         |
| Insurance Status                 |                  |                      |                   |
| Commercial                       | 105 (7.5%)       | 67 (9.2%)            | 38 (5.7%)         |
| Medicaid                         | 642 (46.0%)      | 305 (42.0%)          | 337 (50.3%)       |
| Medicare                         | 385 (27.6%)      | 221 (30.4%)          | 164 (24.5%)       |
| Medicare Managed                 | 154 (11.0%)      | 94 (12.9%)           | 60 (9.0%)         |
| Self-Pay                         | 107 (7.7%)       | 38 (5.2%)            | 69 (10.3%)        |
| Other                            | 4 (0.3%)         | 2 (0.3%)             | 2 (0.3%)          |
| National ADI Quintile            |                  |                      |                   |
| Quintile 1 (Most disadvantaged)  | 176 (12.6%)      | 69 (9.5%)            | 107 (16.0%)       |
| Quintile 2                       | 379 (27.1%)      | 189 (26.0%)          | 190 (28.4%)       |
| Quintile 3                       | 429 (30.7%)      | 237 (32.6%)          | 192 (28.7%)       |
| Quintile 4                       | 312 (22.3%)      | 175 (24.1%)          | 137 (20.4%)       |
| Quintile 5 (Least disadvantaged) | 101 (7.2%)       | 57 (7.8%)            | 44 (6.6%)         |

ADI = Area Deprivation Index; SD = Standard deviation
