# Supplementary material
Source: PubMed Central journal article supplement (PMC8281953)
Supplement: NIHMS1572384-supplement-ST2.pdf [file NIHMS1572384-supplement-ST2.pdf]

**Table S2. Univariate and multivariate regression analysis of the association between the most disadvantaged Area of Deprivation Index deciles and adherence to first-time referral for diabetic retinopathy screening**

|                                  | Univariate analysis<br>Odds ratio (95% CI) | p-value        | Multivariate Model*<br>Odds ratio (95% CI) | p-value       |
|----------------------------------|--------------------------------------------|----------------|--------------------------------------------|---------------|
| ADI National Quintile            |                                            |                |                                            |               |
| Least Disadvantaged 60%          | 1.00                                       |                | 1.00                                       |               |
| Fourth-Most Disadvantaged Decile | 1.02 (0.77-1.36)                           | <b>0.884</b>   | 1.10 (0.82-1.48)                           | 0.538         |
| Third-Most Disadvantaged Decile  | 0.48 (0.33-0.70)                           | <b>0.00016</b> | 0.53 (0.36-0.78)                           | <b>0.0015</b> |
| Second-Most Disadvantaged Decile | 0.41 (0.22-0.72)                           | <b>0.0027</b>  | 0.48 (0.26-0.86)                           | <b>0.015</b>  |
| Most Disadvantaged Decile        | 0.56 (0.38-0.82)                           | <b>0.0034</b>  | 0.65 (0.44-0.97)                           | <b>0.035</b>  |

\*Multivariate analysis controls for age, race and insurance status  
 ADI = Area Deprivation Index; CI = Confidence interval
